# Supplementary material for: Network-based prediction of polygenic disease genes involved in cell motility
Source: PubMed Central journal article supplement (PMC6584515; doi:10.1186/s12859-019-2834-1), 2019-06-20
Supplement: 12859_2019_2834_MOESM1_ESM.pdf [file 12859_2019_2834_MOESM1_ESM.pdf]

*Supplementary Information for*  
Network-Based Prediction of Polygenic Disease Genes  
Involved in Cell Motility

Miriam Bern<sup>\*1</sup>, Alexander King<sup>\*1</sup>, Derek Applewhite<sup>1</sup> and Anna Ritz<sup>†1</sup>

<sup>1</sup>Biology Department, Reed College, Portland, OR

All software and datasets are publicly available and provided on the supplementary website:

<https://github.com/annaritz/CREU-szgene-predictor>.

## Contents

|                                                                 |           |
|-----------------------------------------------------------------|-----------|
| <b>S1 Supplementary Methods: MULTI-LAYER PSEUDO-SINKSOURCE+</b> | <b>2</b>  |
| <b>S2 Supplementary Figures</b>                                 | <b>4</b>  |
| <b>S3 Supplementary Tables</b>                                  | <b>11</b> |

---

\*These authors contributed equally to this work.

†aritz@reed.edu

## S1 Supplementary Methods: MULTI-LAYER PSEUDO-SINKSOURCE+

We propose a modification to the input graph  $G$  that promotes genes near many positives over low-degree genes that are near only one or two positives. Given the undirected, weighted interactome  $G$ , curated sets  $C$  and  $\bar{C}$ , and a small integer  $k^1$ , we construct a new graph  $G' = (V', E')$  as follows (Figure S1):

1. Make  $k$  copies of  $G$  to produce

$$G_1 = (V_1, E_1), G_2 = (V_2, E_2), \dots, G_k = (V_k, E_k).$$

Edges retain their weights from the original graph  $G$ .

2. Make one additional copy  $V_0$  of the node set  $V$ . There are now  $k+1$  copies of each node (e.g.,  $v_0, v_1, \dots, v_k$ ).
3. Introduce edges that connect each node in  $V_0$  to its copies in each of the other graphs. That is, we define edges

$$(v_0, v_1), (v_0, v_2), \dots, (v_0, v_k)$$

for all nodes  $v_0 \in V_0$ . Each node in  $V_0$  will then have  $k$  edges. Let these edges be defined by  $E_0$ ; each edge in  $E_0$  is given a user-defined weight (we use a constant weight of 1.0).

The new graph  $G' = (V', E')$  is the union of the nodes and edges from these copies:

$$V' = \bigcup_{i=0}^k V_i \text{ and } E' = \bigcup_{i=0}^k E_i. \quad (1)$$

The labeled negatives and positives are randomly partitioned into  $k$  groups, which are then added to the graph copies  $G_1$  through  $G_k$  (Figure S1(B)).

Finally, we introduce the single sink node, connected to all nodes in  $V'$  with weight  $\lambda$ . We test  $\lambda$  values across three orders of magnitude: 0, 0.01, 0.1, 10, and 50. We call this method MULTI-LAYER PSEUDO-SINKSOURCE+; note that ONE-LAYER PSEUDO-SINKSOURCE+ with  $\lambda = 0$  corresponds to the original SinkSource method, and ONE-LAYER PSEUDO-SINKSOURCE+ with  $\lambda > 0$  corresponds to PSEUDO-SINKSOURCE+.

<sup>1</sup>In the main manuscript, this parameter is called  $l$ .

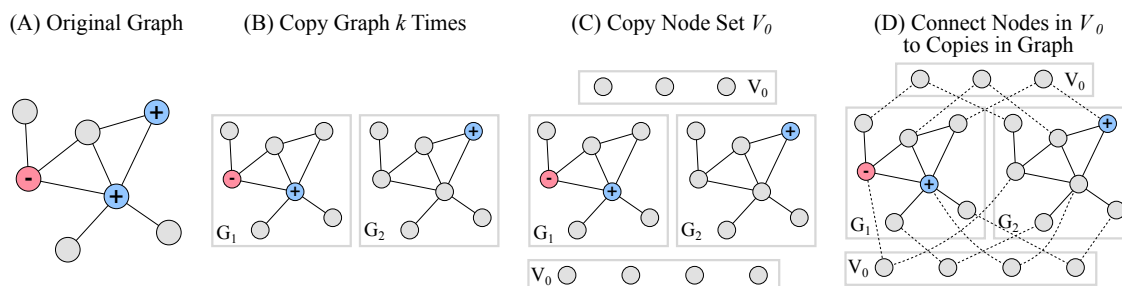

Figure S1: Multi-Layer Graph Construction for  $k = 2$  layers and  $\lambda = 0$ . (A) Original (labeled) graph  $G$ , and (B–D) graph  $G'$  built from  $G$ . Positives and negatives are partitioned across the graph copies in (B). In Panel (D), dashed edges denote  $E_0$ ;  $\lambda$ -weighted sink node not shown.

We take the predicted labels from  $V_0 \in V'$  as the final node scores, which combines the predictions from each of the  $k$  networks using a weighted average based on the user-defined edge weights for  $E_0$  (Figure S1(B–D)). Note that the nodes  $V_0$  ensure that the predicted values for  $v_1, v_2, \dots, v_k$  are similar due to the Gaussian smoothing function.

Depending on the value of  $\lambda$ , the predicted labels from  $V_0$  may be very low. For example, if  $\lambda = 1$  with  $k = 2$  layers, then  $\frac{1}{3}$  of the contribution for every  $v \in V_0$  will be from a labeled negative. Thus, as a post-processing step, we normalize the predicted labels in  $V_0$  to be between 0 and 1 by dividing by the maximum predicted value from  $V_0$ .

Figure S2 illustrates the difference between MULTI-LAYER PSEUDO-SINKSOURCE+ with one and two layers, where nodes  $c$  and  $d$  will automatically be assigned a value of 1 in the one-layer example.

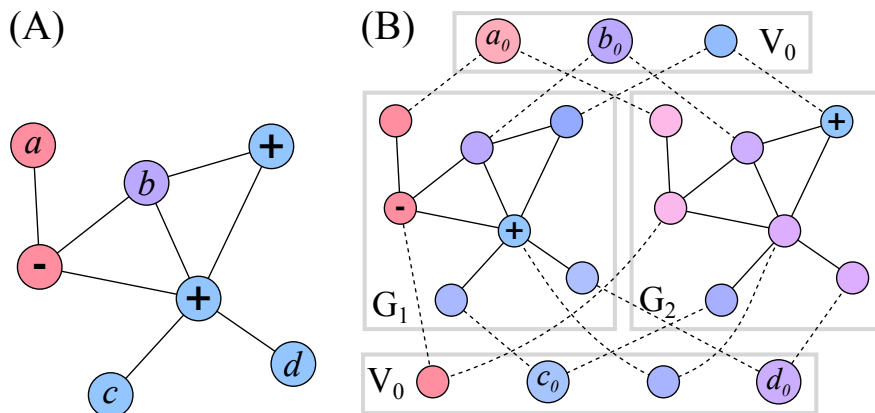

Figure S2: TWO-LAYER PSEUDO-SINKSOURCE+ example with  $\lambda = 0$ . Nodes are colored according to proximity to labeled positives and negatives. (A) In the one-layer method,  $c$  and  $d$  will both be assigned a score of 1. (B) In the two-layer method,  $c$  and  $d$  will be assigned different scores due to the contributions from two layers.

## S2 Supplementary Figures

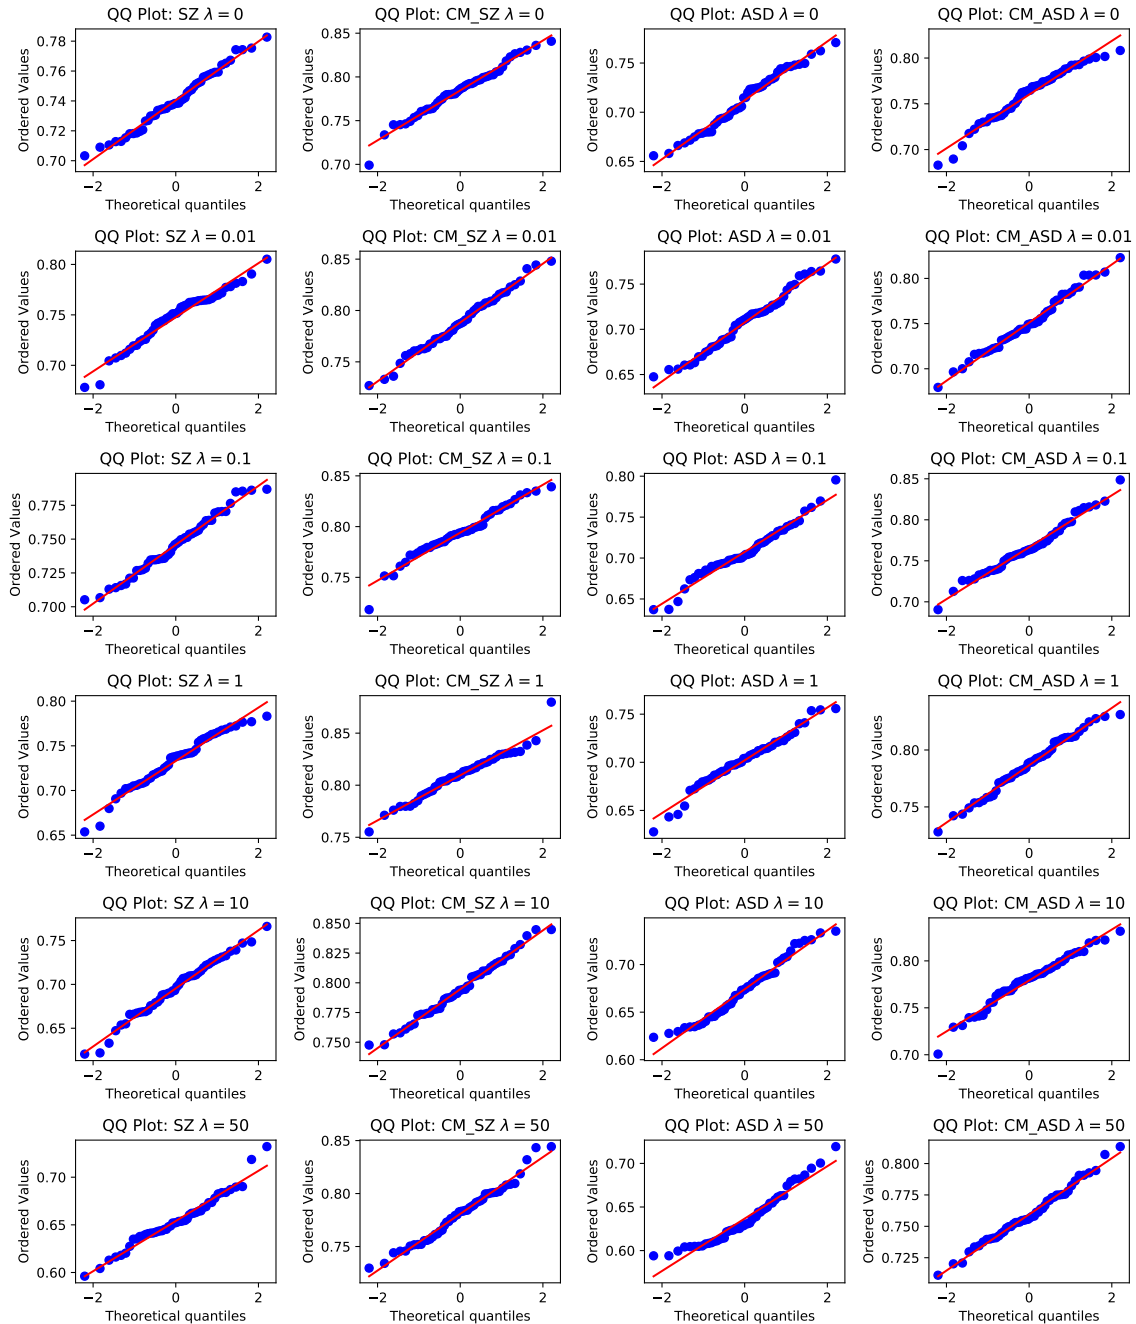

Figure S3: Gaussian Quantile-Quantile plots for the distribution of AUC values in  $k$ -fold cross validation runs for PSEUDO-SINKSOURCE+. Columns denote the experiment: schizophrenia (SZ), cell motility with SZ negatives (CM\_SZ), autism (ASD), and cell motility with ASD negatives (CM\_ASF). Rows denote the  $\lambda$  value (0,0.01,0.1,1,10, and 50). Note that PSEUDO-SINKSOURCE+ with  $\lambda = 0$  is the same as SINKSOURCE.

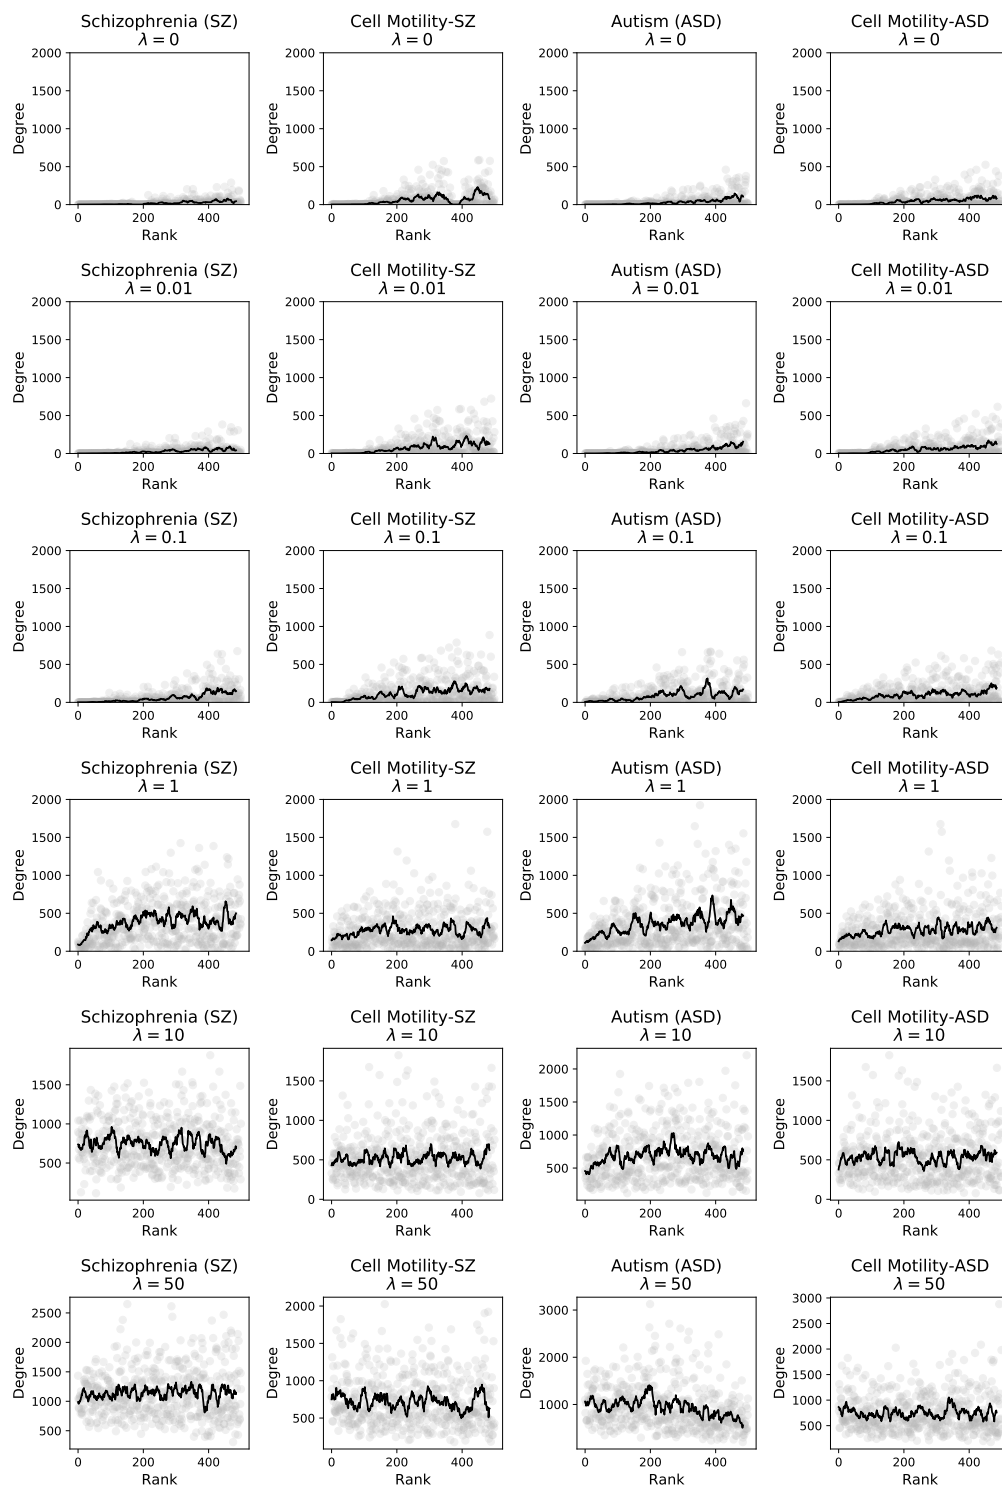

Figure S4: Node ranking (x-axis) by degree (y-axis) for the first 500 unlabeled nodes for PSEUDO-SINKSOURCE+ run on each dataset. Black line denotes moving average (15 nodes).

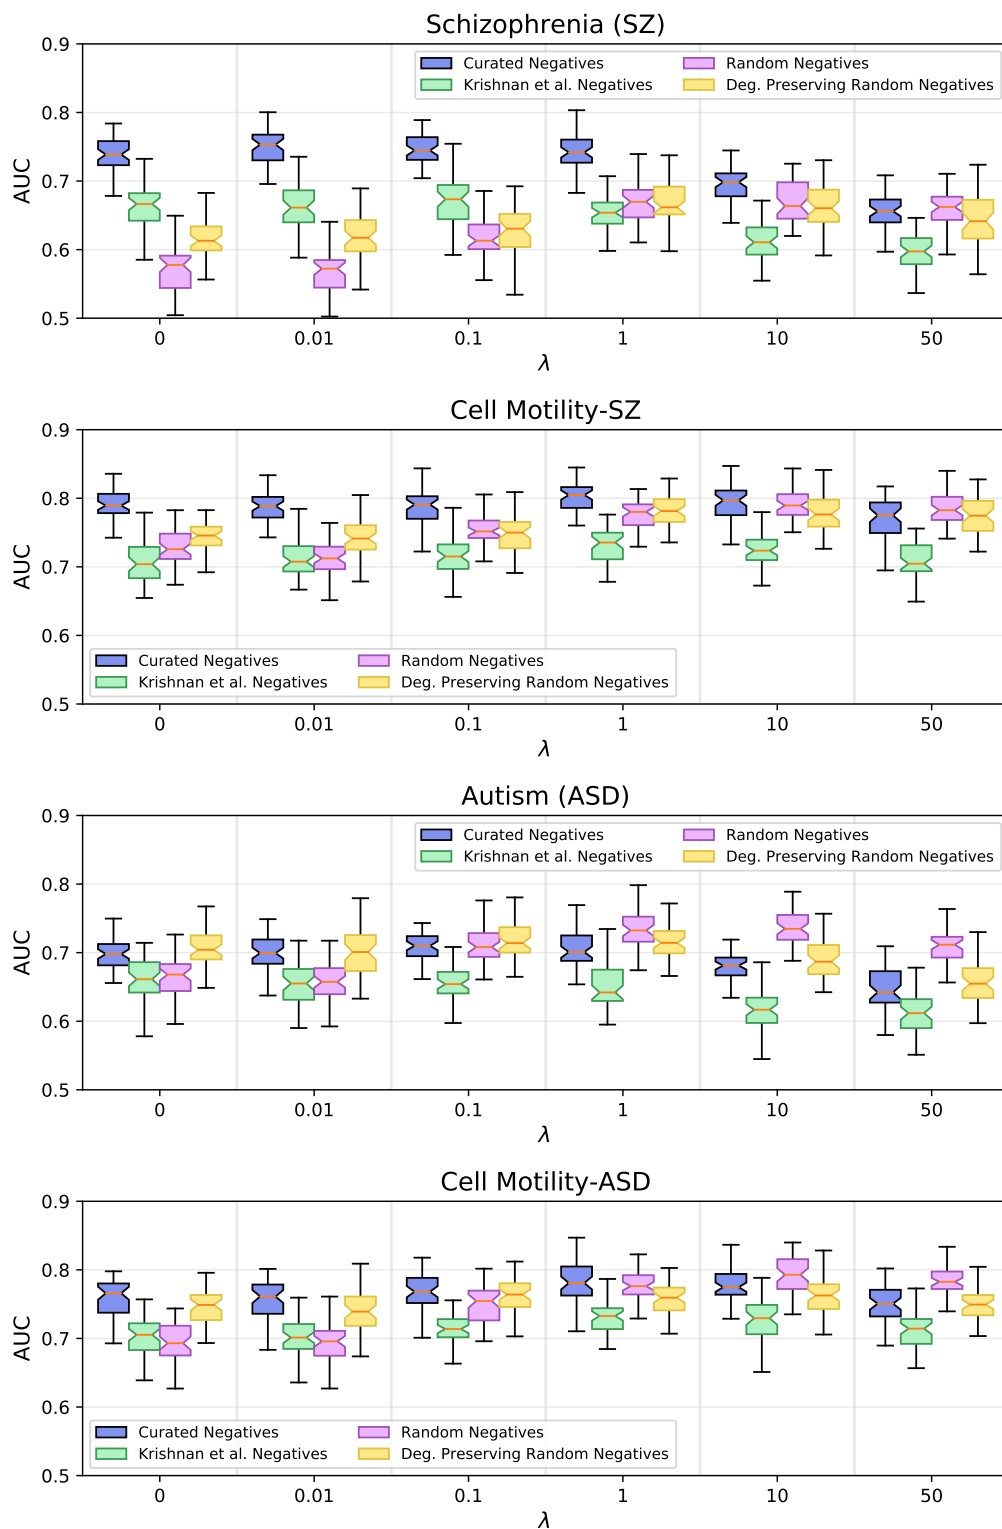

Figure S5: Five-fold cross validation performance (AUC across 50 iterations) of PSEUDO-SINKSOURCE+ with the curated negatives (blue) compared to the method run with the Krishnan et al. negatives (green), random negatives (pink), and random negatives preserving the degree distribution of the curated negative set (yellow).

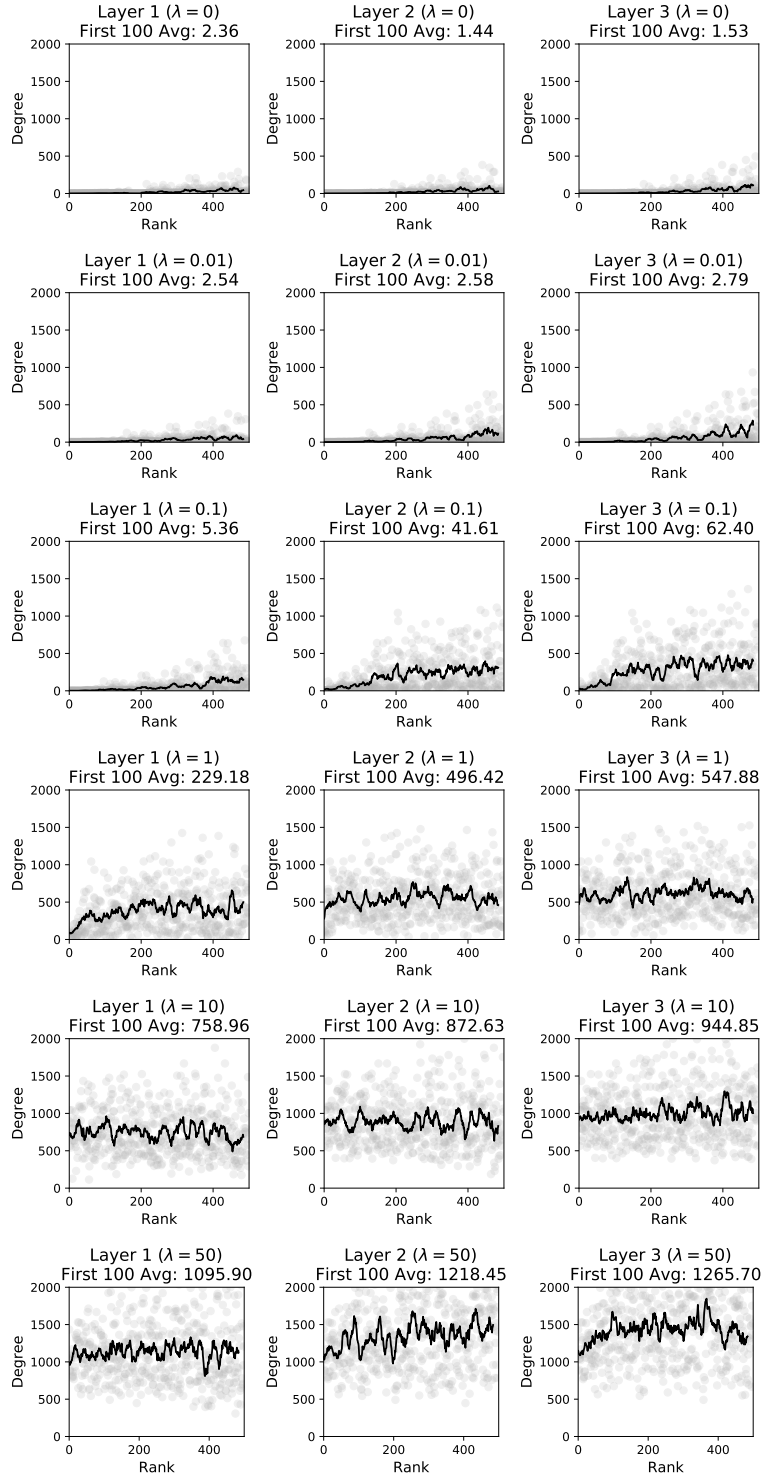

Figure S6: Node ranking (x-axis) by degree (y-axis) for the first 500 unlabeled nodes for MULTI-LAYER PSEUDO-SINKSOURCE+ with one (left), two (middle), or three (right) layers on the schizophrenia dataset. Black line denotes moving average (15 nodes). Note that ONE-LAYER PSEUDO-SINKSOURCE+ is equivalent PSEUDO-SINKSOURCE+, and that ONE-LAYER PSEUDO-SINKSOURCE+ with  $\lambda = 0$  is equivalent to SINKSOURCE.

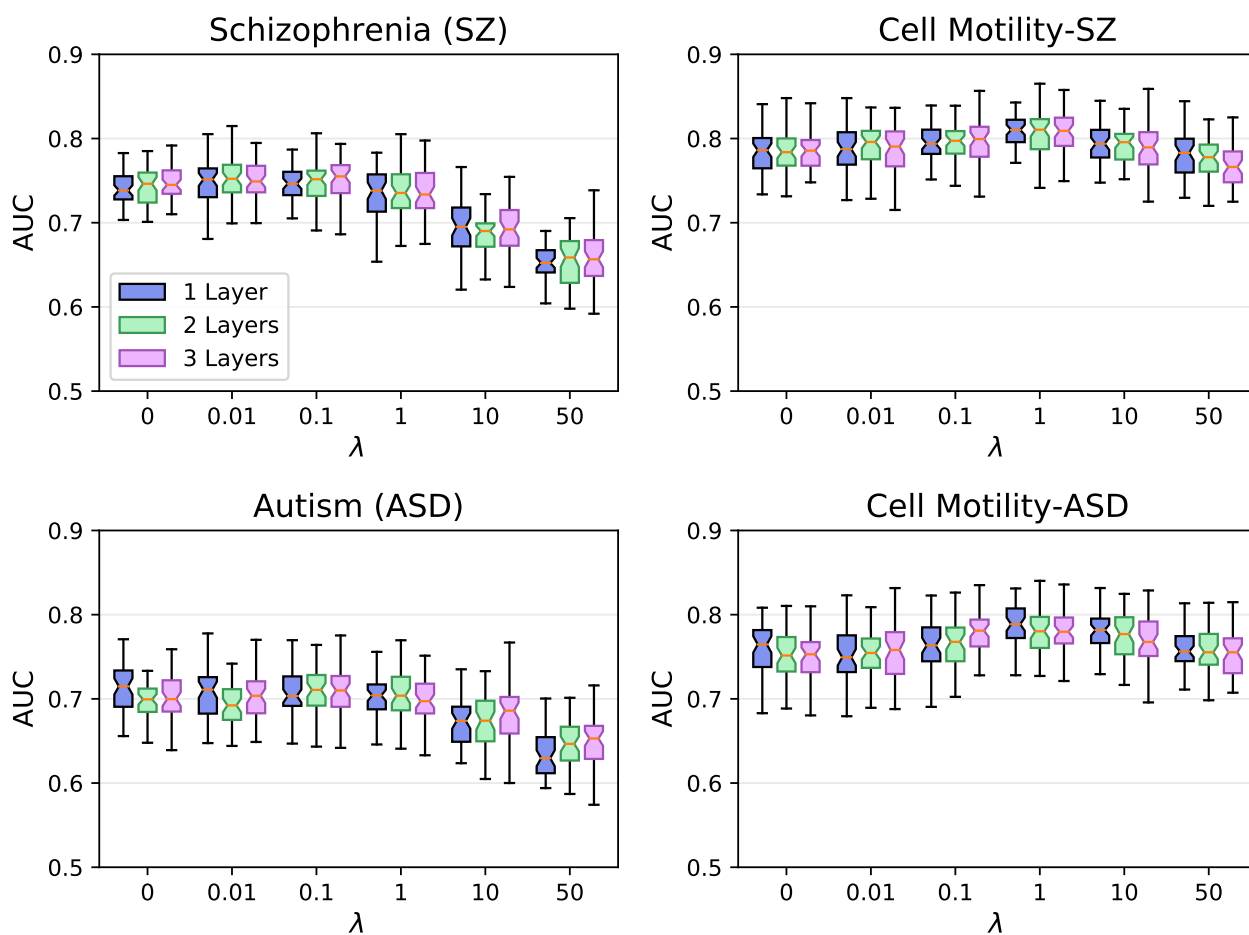

Figure S7: Five-fold cross validation performance (AUC across 50 iterations) of MULTI-LAYER PSEUDO-SINKSOURCE+ for one layer (PSEUDO-SINKSOURCE+, blue), two layers (green), and three layers (pink) across different values of  $\lambda$ . Details about the MULTI-LAYER PSEUDO-SINKSOURCE+ method can be found in the Supplementary Methods.



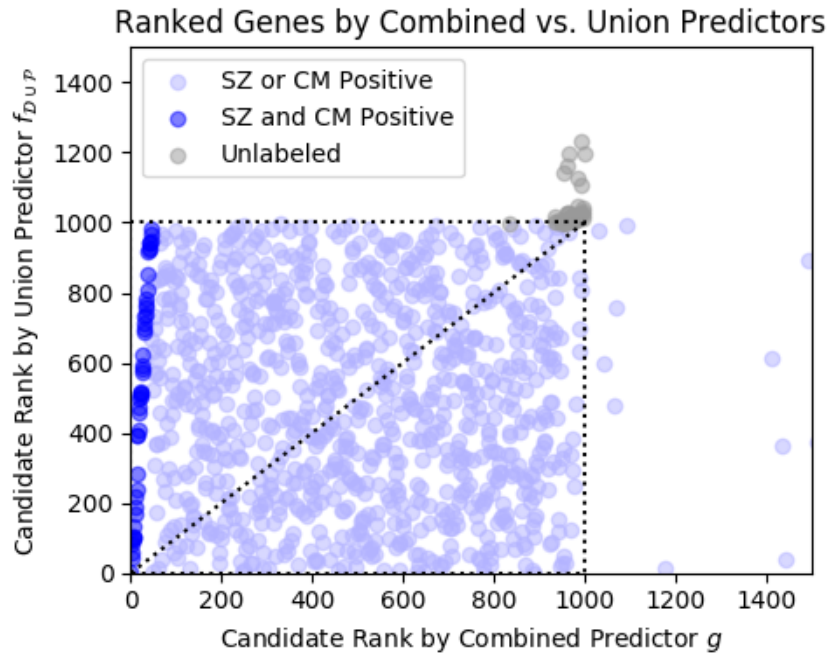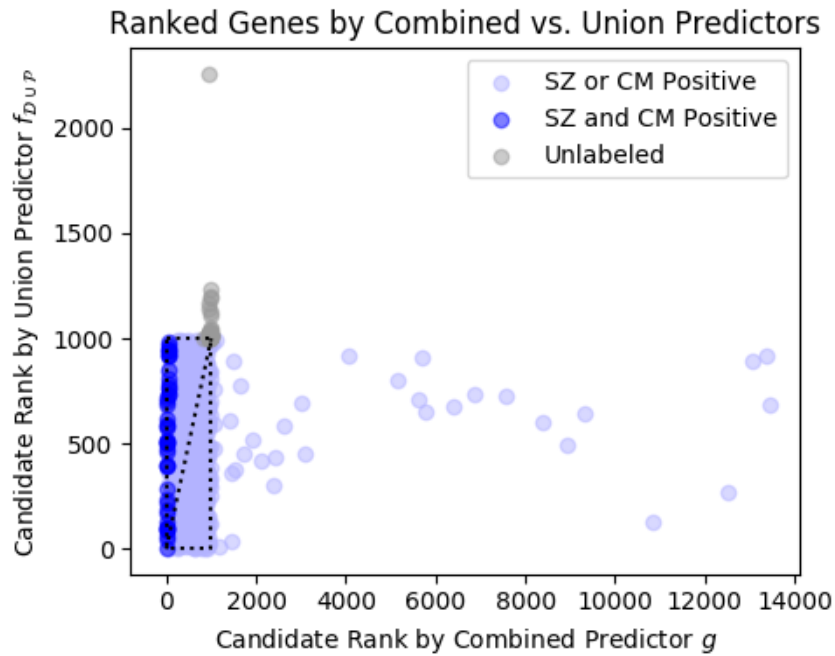

Figure S8: (Top, Figure 7 right) Scatter plot of gene rankings in combined  $g$  vs. union  $f_{DUP}$ . Each point is a gene, and the first 1,000 ranked nodes in each method is plotted (dotted box). (Bottom) Full version top figure.

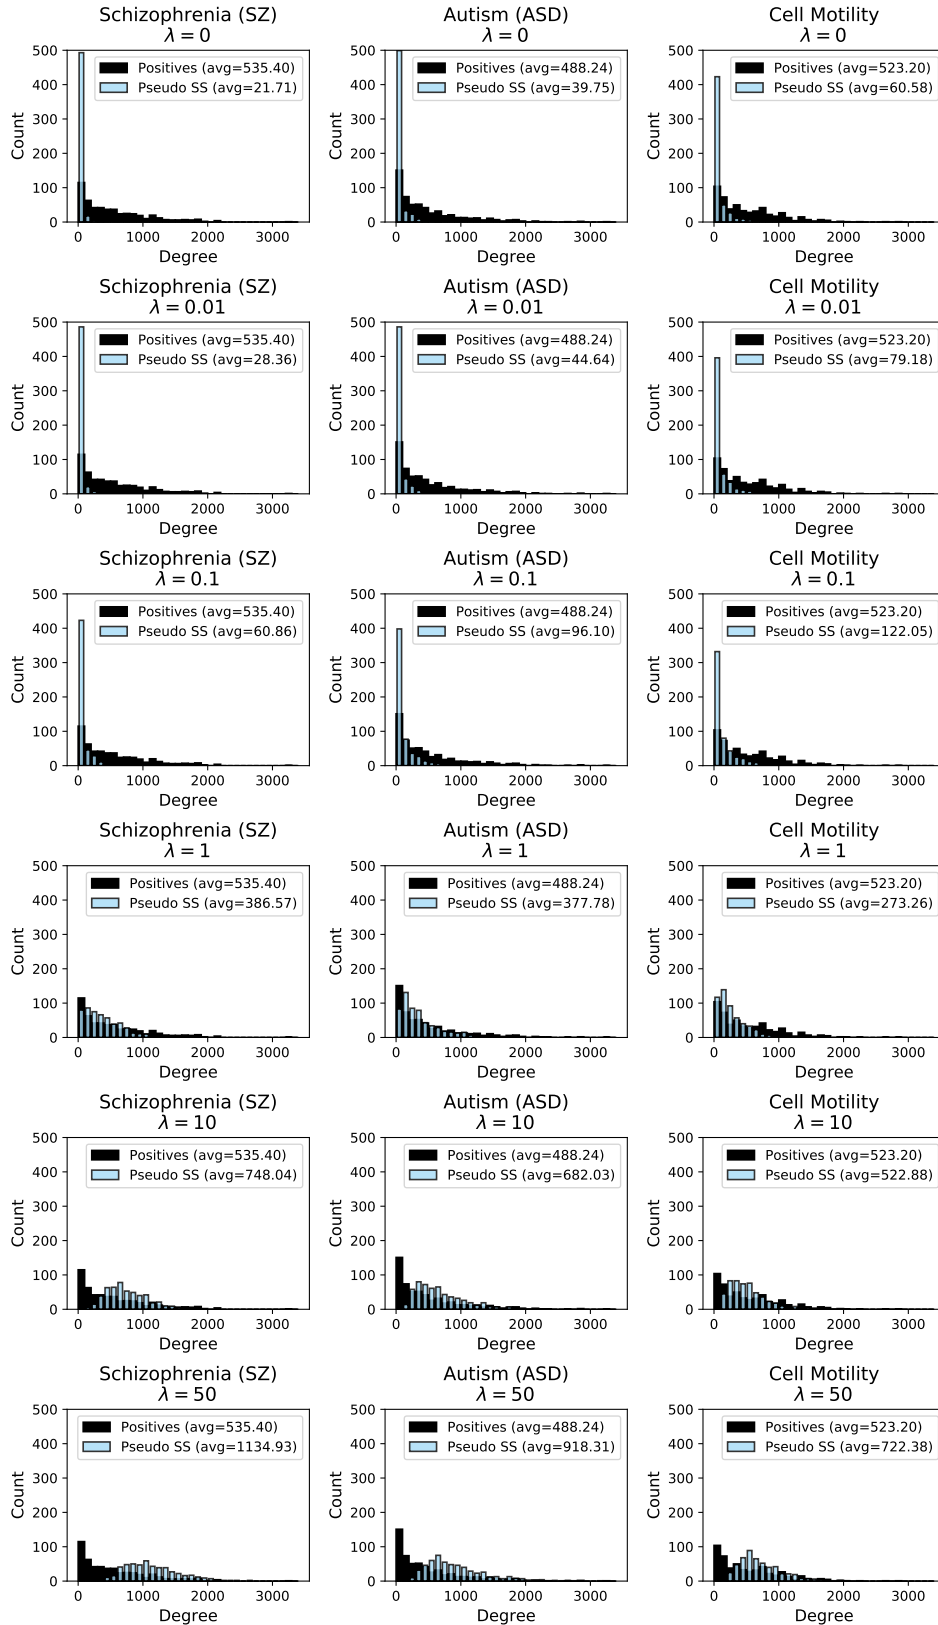

Figure S9: Degree distribution of curated positives (black) and the same number of the top-ranked unlabeled nodes from PSEUDO-SINKSOURCE+ (blue) for different values of  $\lambda$ .

### S3 Supplementary Tables

| Gene Name | Entrez | Rank | Deg  | $f_{\mathcal{D}}$ | $f_{\mathcal{P}}$ | $f_{\mathcal{D}\cup\mathcal{P}}$ | $g(v)$ |
|-----------|--------|------|------|-------------------|-------------------|----------------------------------|--------|
| SHANK3    | 85358  | 51   | 64   | <i>1.00</i>       | <b>0.56</b>       | 1.00                             | 0.56   |
| PAK3      | 5063   | 52   | 114  | <b>0.55</b>       | <i>1.00</i>       | 1.00                             | 0.55   |
| CTNNA2    | 1496   | 53   | 23   | <b>0.55</b>       | <i>1.00</i>       | 1.00                             | 0.55   |
| NCAM2     | 4685   | 54   | 107  | <b>0.55</b>       | <i>1.00</i>       | 1.00                             | 0.55   |
| SHC3      | 53358  | 55   | 258  | <b>0.54</b>       | <i>1.00</i>       | 1.00                             | 0.54   |
| PAK5      | 57144  | 56   | 217  | <b>0.54</b>       | <i>1.00</i>       | 1.00                             | 0.54   |
| CNTN1     | 1272   | 57   | 428  | <b>0.51</b>       | <i>1.00</i>       | 1.00                             | 0.51   |
| CAMK2A    | 815    | 58   | 1081 | <b>0.51</b>       | <i>1.00</i>       | 1.00                             | 0.51   |
| CHRM2     | 1129   | 59   | 101  | <b>0.51</b>       | <i>1.00</i>       | 1.00                             | 0.51   |
| CNTN2     | 6900   | 60   | 692  | <b>0.51</b>       | <i>1.00</i>       | 1.00                             | 0.51   |
| NRXN3     | 9369   | 61   | 815  | <b>0.51</b>       | <i>1.00</i>       | 1.00                             | 0.51   |
| RASGRF1   | 5923   | 62   | 1025 | <b>0.51</b>       | <i>1.00</i>       | 1.00                             | 0.51   |
| PPP2R2B   | 5521   | 63   | 788  | <b>0.51</b>       | <i>1.00</i>       | 1.00                             | 0.51   |
| CADM3     | 57863  | 64   | 1009 | <b>0.50</b>       | <i>1.00</i>       | 1.00                             | 0.50   |
| NRG2      | 9542   | 65   | 131  | <b>0.50</b>       | <i>1.00</i>       | 1.00                             | 0.50   |
| ITGA8     | 8516   | 66   | 331  | <b>0.50</b>       | <i>1.00</i>       | 1.00                             | 0.50   |
| MAPK10    | 5602   | 67   | 785  | <b>0.50</b>       | <i>1.00</i>       | 1.00                             | 0.50   |
| GJA1      | 2697   | 68   | 224  | <i>1.00</i>       | <b>0.50</b>       | 1.00                             | 0.50   |
| NCAM1     | 4684   | 69   | 1082 | <b>0.50</b>       | <i>1.00</i>       | 1.00                             | 0.50   |
| SERPINE1  | 5054   | 70   | 593  | <i>1.00</i>       | <b>0.50</b>       | 1.00                             | 0.50   |

Table S1: Candidate genes associated with autism ( $\mathcal{D}$ ) and cell motility ( $\mathcal{P}$ ), ordered by their combined score  $g(v)$ . Genes in the top 70 ranking that are unlabeled in either in  $\mathcal{D}$  and  $\mathcal{P}$  are shown. Italic font indicates that the gene is a positive; bold font indicates that the gene is unlabeled.
